# Supplementary material for: Robust hollow TiO2 spheres for lithium/sodium ion batteries with excellent cycling stability and rate capability
Source: Royal Society of Chemistry journal article supplement (doi:10.1039/d1qi00990g), 2021-01-01
Supplement: d1qi00990g1.pdf [file d1qi00990g1.pdf]

Supporting Information

**Robust Hollow TiO<sub>2</sub> Spheres for Lithium/Sodium Ion Batteries with Excellent Cycle Stability and Rate Capability**

Menglong Yao, Hongkang Wang,\* Ruifeng Qian, Tianhao Yao, Jian-Wen Shi, Yonghong Cheng

*State Key Lab of Electrical Insulation and Power Equipment, Center of Nanomaterials for Renewable Energy (CNRE), School of Electrical Engineering, Xi'an Jiaotong University, Xi'an 710049, PR China*

*\*Corresponding author. E-mail: [hongkang.wang@mail.xjtu.edu.cn](mailto:hongkang.wang@mail.xjtu.edu.cn)*

## Table of Contents

|                           |    |
|---------------------------|----|
| Experimental Section..... | 3  |
| Figure S1.....            | 4  |
| Figure S2.....            | 4  |
| Figure S3.....            | 5  |
| Figure S4.....            | 6  |
| Figure S5.....            | 7  |
| Figure S6.....            | 8  |
| Figure S7.....            | 9  |
| Figure S8.....            | 9  |
| Figure S9.....            | 10 |
| Table S1.....             | 11 |
| Table S2.....             | 12 |
| References.....           | 13 |

## Experimental Section

### Materials characterization

The microstructures of the products were characterized by scanning electron microscopy (SEM, FEI, Quanta 250F) and (high-resolution) transmission electron microscopy ((HR)TEM, Thermo Fisher, Talos F200X). The phase structures of the products were characterized by X-ray diffraction (XRD) under Cu K $\alpha$  radiation ( $k = 1.5418 \text{ \AA}$ ) at 30 kV and 10 mA in the  $2\theta$  range of 10-80°. The Raman spectrum was obtained on Renishaw Raman RE01 Microscope with an excitation laser of 633 nm. Brunauere-Emmette-Teller (BET) method was used to analyze the specific surface area and the pore characteristics, and the nitrogen sorption isotherms were obtained by using a Quantachrome Surface Area Analyzer (ASAP 2020 Plus HD88) at 77 K. The elemental composition and chemical state of the products were analyzed by X-ray photoelectron spectroscopy (XPS) using an ESCALAB Xi<sup>+</sup> Thermo Fisher XPS instrument.

### Electrochemical measurements

The electrochemical properties of the hollow TiO<sub>2</sub> nanospheres were investigated in CR2025 coin-type half-cells. Firstly, the working electrodes were fabricated by casting a slurry on the copper foil, and the slurry was prepared by mixing the active materials (hollow TiO<sub>2</sub>), conductive carbon black (ECP-600JD) and polyvinylidene fluoride (PVDF, HSV900, Arkema) with the weight ratio of 7:2:1 and 1-methyl-2-pyrrolidinone (NMP, C<sub>5</sub>H<sub>9</sub>NO, 99.5%, Macklin) as a solvent. The slurry coated copper foils were then dried under vacuum at 60 °C for 12h. The working electrodes were punched into round sheets with a diameter of 14 mm, and the loading amount of the active material was about 1.2±0.2 mg/cm<sup>2</sup>. LIB/SIB cells were assembled in Ar-filled glove box (H<sub>2</sub>O < 0.1 ppm, O<sub>2</sub> < 0.1 ppm). For LIBs, the lithium foils were used as the counter electrodes, and Celgard 2400 microporous membranes as the separators. A solution of 1 M LiPF<sub>6</sub> in a 1:1:1 of ethylene carbonate (EC), diethyl carbonate (DEC), and ethylmethyl carbonate (EMC) was used as the electrolyte. For SIBs, the sodium foils were used as the counter electrodes, and the Whatman glass microfiber membranes as the separators. 1M NaClO<sub>4</sub> in EC/DMC (1:1 in volume) with addition of 5 vol% of fluoroethylene carbonate (FEC) was used as the electrolyte. The galvanostatic discharge-charge tests of LIBs and SIBs were performed on a battery test system (Neware BTS, China). Cyclic voltammetry (CV, in the range of 1.0-3.0 V for LIBs, and 0.01-3.0 V for SIBs) and electrochemical impedance spectroscopy (EIS; 0.01-100kHz) were performed on CHI660 (Chenghua, Shanghai) electrochemical workstation.

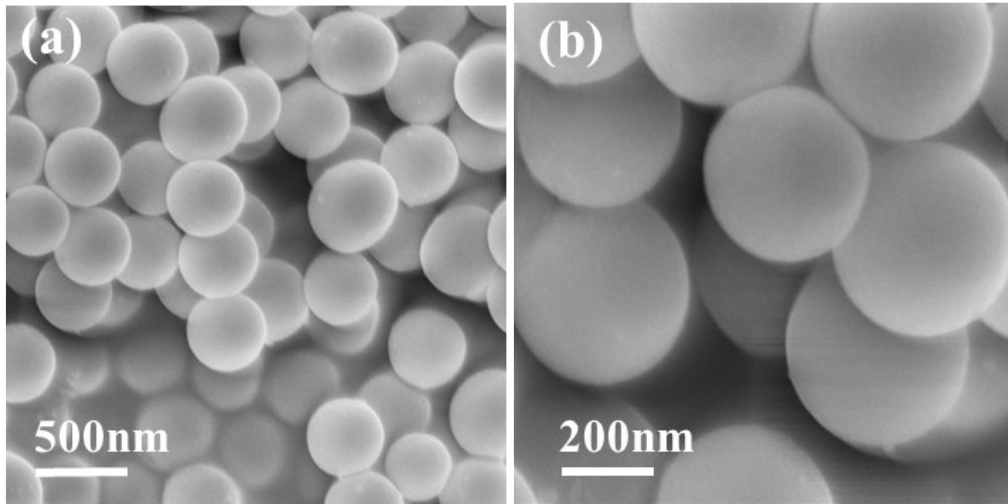

Figure S1. (a, b) SEM images of the as-prepared phenolic resin spheres at different magnification.

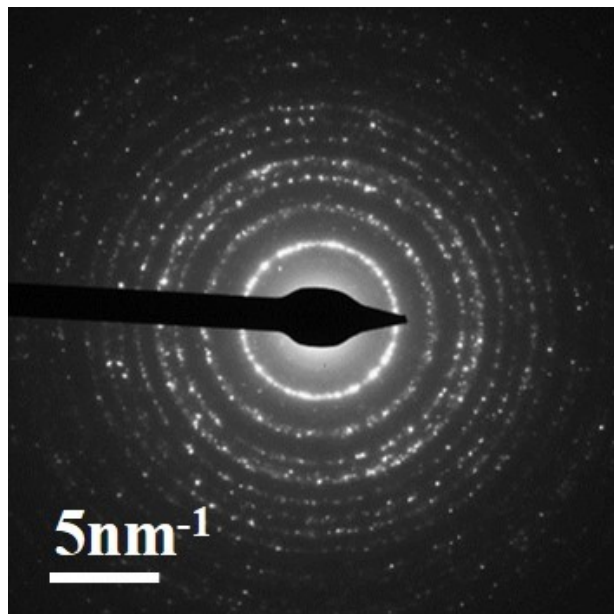

Figure S2. SAED pattern taken on a single TiO<sub>2</sub> hollow sphere.

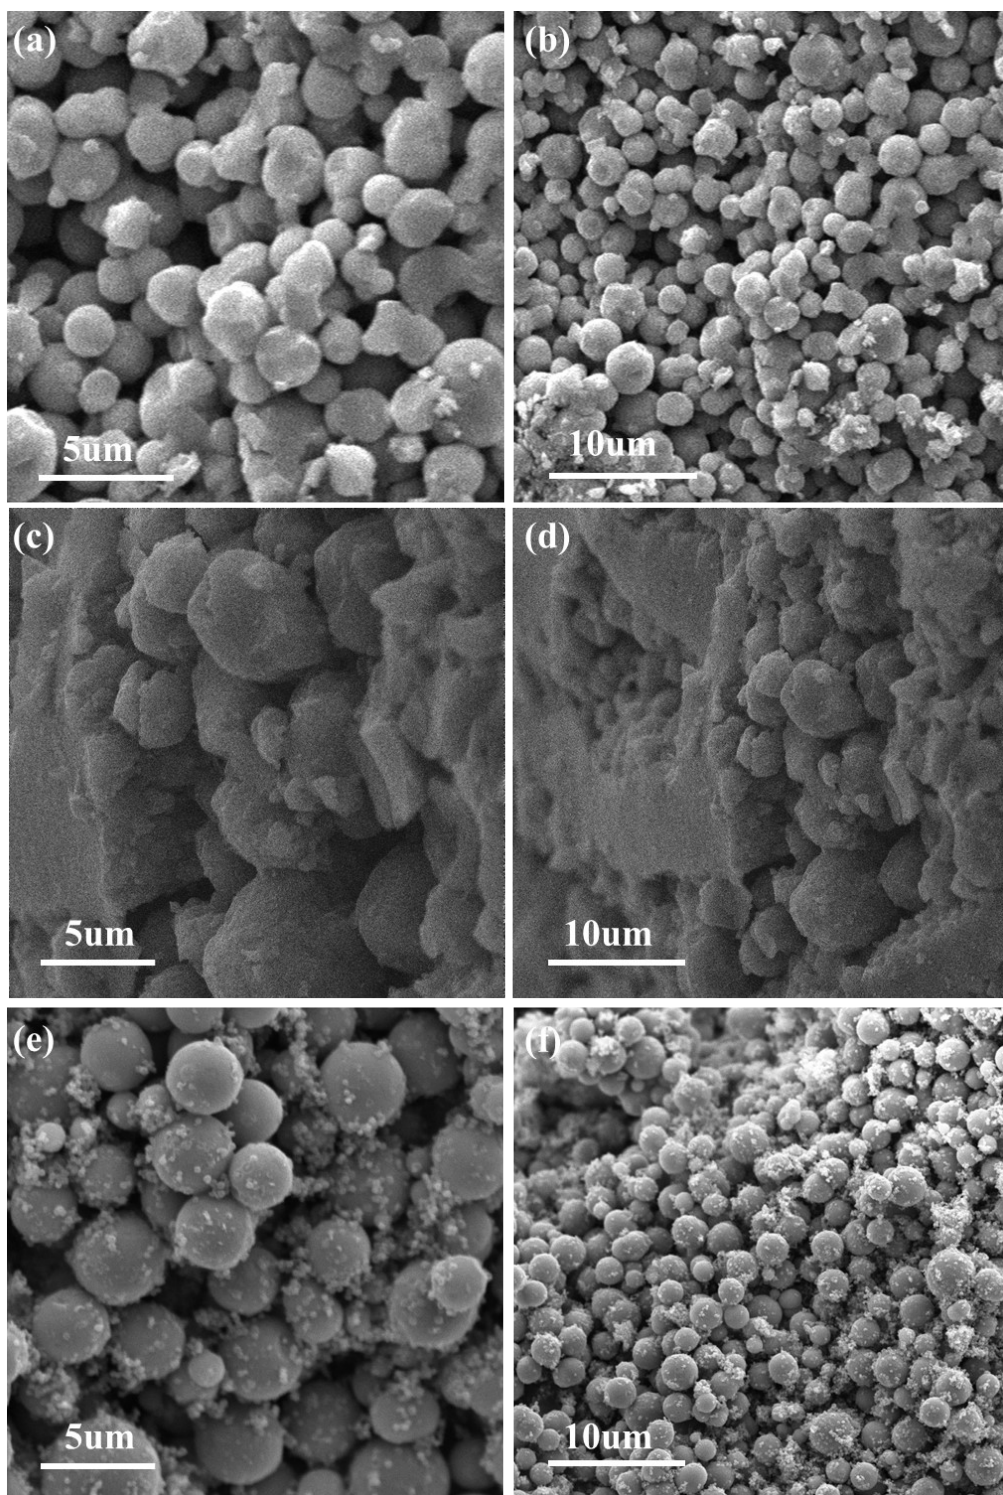

Figure S3. (a-d) SEM images of the TiO<sub>2</sub> prepared without the presence of phenolic resin nanospheres by solvothermal reaction under static (a, b; 0 r/min) and stirring (c, d; 500 r/min) conditions, respectively. (e-f) SEM images of TiO<sub>2</sub> prepared with the presence of phenolic resin nanospheres by solvothermal reaction under static (a, b; 0 r/min). All the products were annealed in air at 600 °C for 2h.

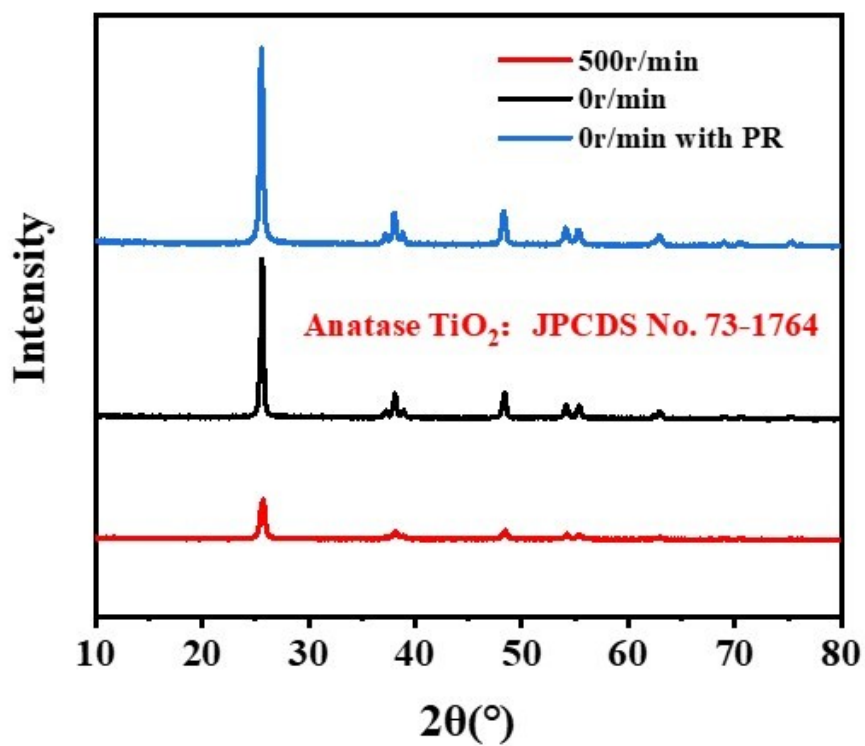

Figure S4. XRD patterns of  $\text{TiO}_2$  prepared without/with the presence of phenolic resin nanospheres by solvothermal reaction under static (0 r/min) and stirring (500 r/min) conditions, followed by annealing in air at 600 °C.

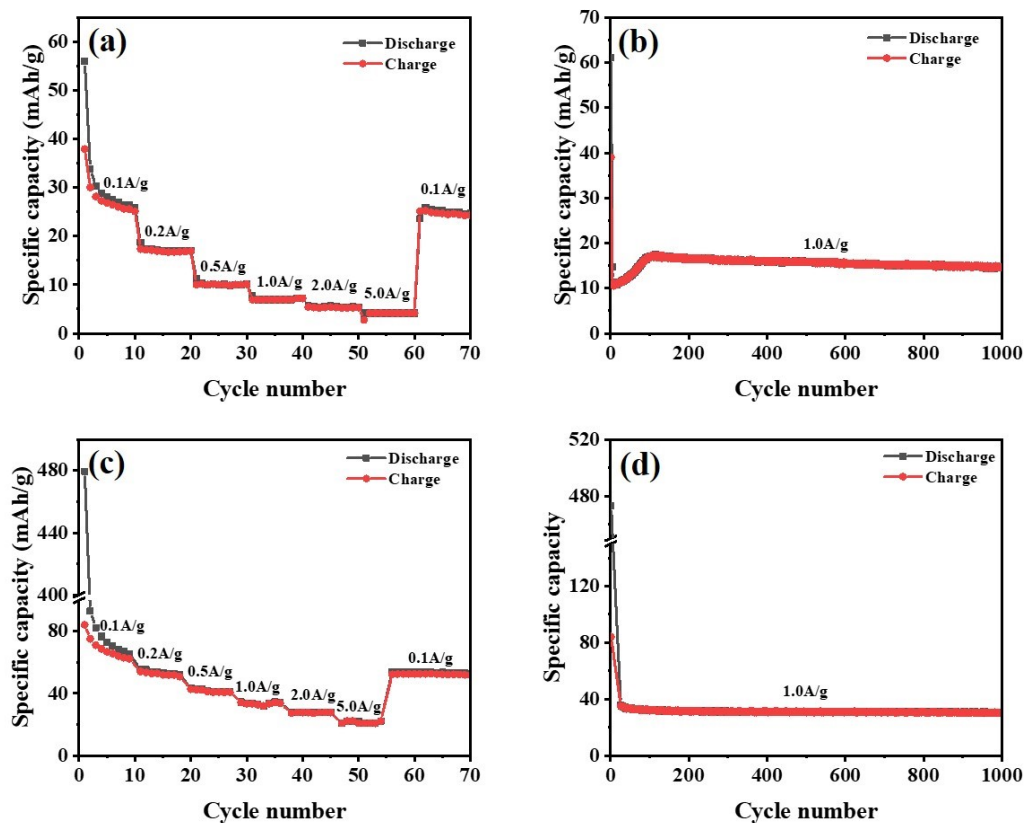

Figure S5. Lithium/Sodium storage behavior of the TiO<sub>2</sub> obtained without the presence of phenolic resin nanospheres by solvothermal reaction under static (0 r/min) condition, followed by annealing in air at 600 °C. (a) Rate performance at various current densities and (b) cycle performance at 1.0 A/g for lithium ion batteries. (c) Rate performance at various current densities and (d) cycle performance at 1.0 A/g for sodium ion batteries. For lithium ion batteries, the gradual capacity increases at 1.0 A/g in Figure S3b can be attributed to the electrochemical activation process of TiO<sub>2</sub> anode. [1, 2]

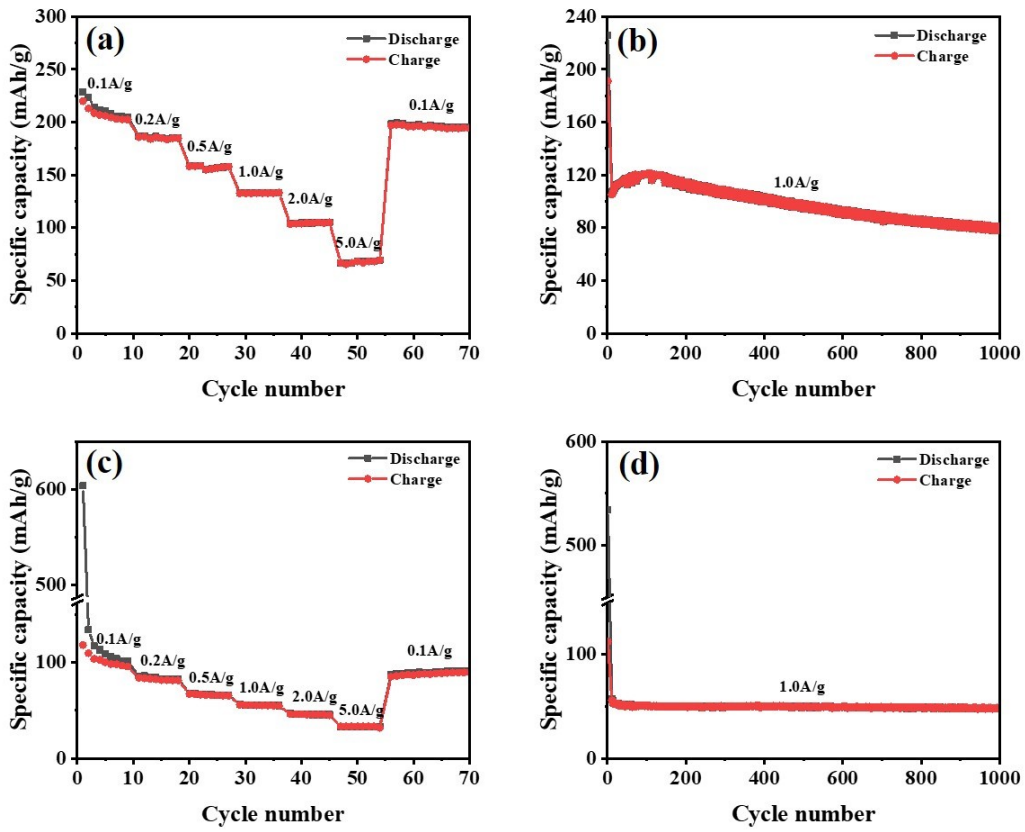

Figure S6. Lithium/Sodium storage behavior of the TiO<sub>2</sub> obtained without the presence of phenolic resin nanospheres by solvothermal reaction under stirring (500 r/min) condition, followed by annealing in air at 600 °C. (a) Rate performance at various current densities and (b) cycle performance at 1.0 A/g for lithium ion batteries. (c) Rate performance at various current densities and (d) cycle performance at 1.0 A/g for sodium ion batteries.



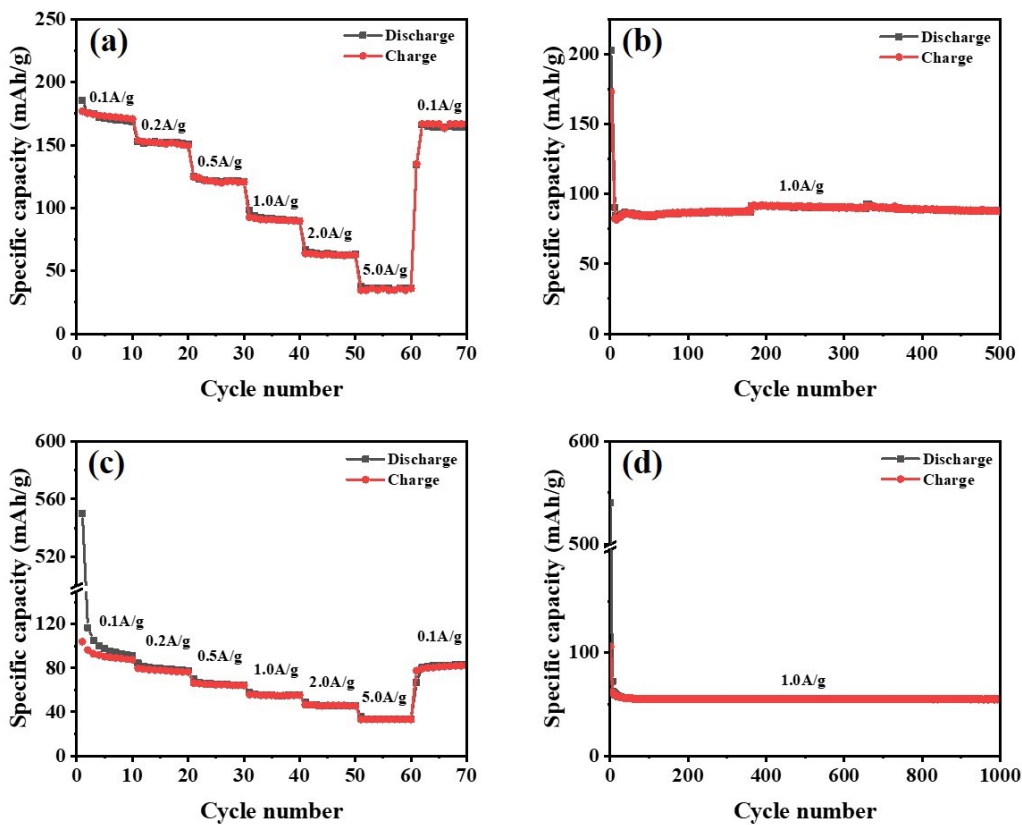

Figure S7. Lithium/Sodium storage behavior of the TiO<sub>2</sub> with the presence of phenolic resin nanospheres by solvothermal reaction under static (0 r/min) condition. (a) Rate performance at various current densities and (b) cycle performance at 1.0 A/g for lithium ion batteries, (c) rate performance at various current densities and (d) cycle performance at 1.0 A/g for sodium ion batteries.

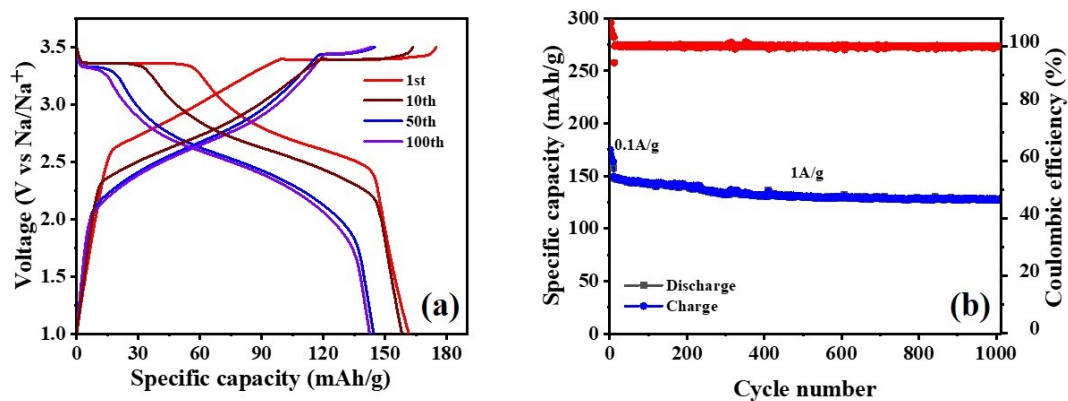

Figure S8. (a-b) Galvanostatic discharge-charge curves of a TiO<sub>2</sub>/Na<sub>3</sub>V<sub>2</sub>(PO<sub>4</sub>)<sub>3</sub> full-cell cycled at a current density 1.0 A/g in the voltage range of 1-3.5 V, cycle performance at 1.0 A/g of full cell.

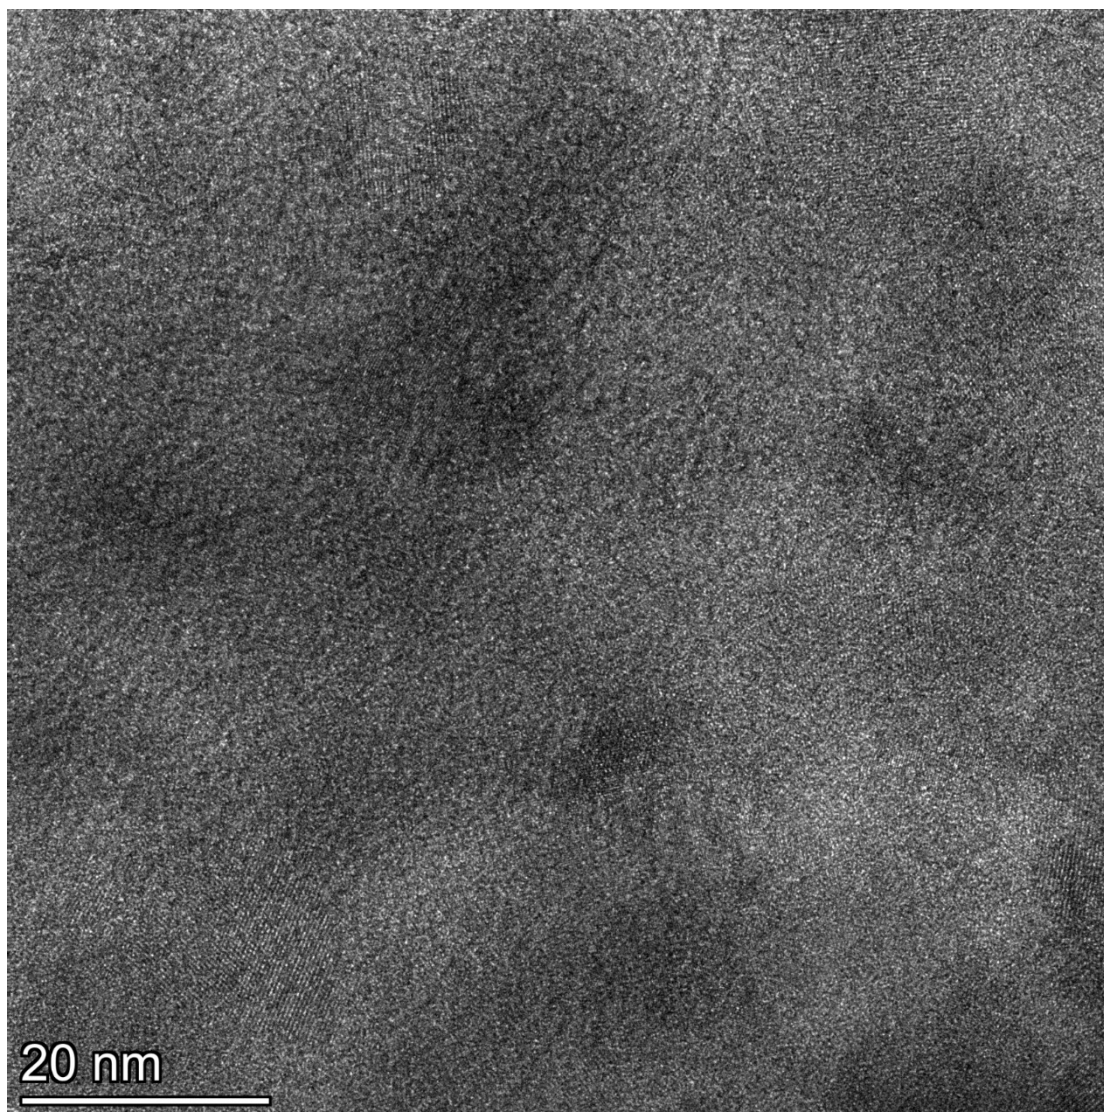

Figure S9. HRTEM image for the charged hollow  $\text{TiO}_2$  electrode after 1000 cycles at 1.0 A/g, which shows the crystalline and amorphous regions.

Table S1. Comparison of the lithium storage behavior of various TiO<sub>2</sub> based anode materials.

| Materials                                        | Capacity (mAh/g) | Cycle       | Current density (mA/g) | Voltage (V vs. Na/Na <sup>+</sup> ) | Ref.             |
|--------------------------------------------------|------------------|-------------|------------------------|-------------------------------------|------------------|
| TiO <sub>2</sub> /C/TiO <sub>2</sub>             | 237              | 100         | 20                     | 1-3                                 | 3                |
| TiO <sub>2</sub> /C                              | 137              | 1000        | 1000                   | 1-3                                 | 4                |
| C/TiO <sub>2</sub> /C                            | 148              | 1000        | 1675                   | 1-3                                 | 5                |
| Core/Shell TiO <sub>2</sub>                      | 151              | 100         | 170                    | 1-3                                 | 6                |
| TiO <sub>2</sub> /Co <sub>3</sub> O <sub>4</sub> | 180              | 500         | 300                    | 0-3                                 | 7                |
| TiO <sub>2</sub> microboxes                      | 187              | 300         | 170                    | 1-3                                 | 8                |
| TiO <sub>2</sub> nanowires                       | 173              | 100         | 170                    | 1-3                                 | 9                |
| Yolk-shell TiO <sub>2</sub>                      | 191              | 40          | 84                     | 1-3                                 | 10               |
| TiO <sub>2</sub> nanotube                        | 180              | 100         | 34                     | 1-3                                 | 11               |
| <b>TiO<sub>2</sub></b>                           | <b>178</b>       | <b>100</b>  | <b>200</b>             | <b>1-3</b>                          | <b>This work</b> |
|                                                  | <b>138.8</b>     | <b>1000</b> | <b>1000</b>            | <b>1-3</b>                          |                  |

Table S2. Comparison of the sodium storage behavior of various TiO<sub>2</sub> based anode materials.

| Materials                                        | Capacity (mAh/g) | Cycle       | Current density (mA/g) | Voltage (V vs. Na/Na <sup>+</sup> ) | Ref.             |
|--------------------------------------------------|------------------|-------------|------------------------|-------------------------------------|------------------|
| N/S-TiO <sub>2</sub>                             | 90               | 1000        | 500                    | 0.02-2                              | 12               |
| Fe-TiO <sub>2</sub>                              | 127.3            | 3000        | 1680                   | 0.001-3                             | 13               |
| B-TiO <sub>2</sub>                               | 141              | 400         | 660                    | 0.01-2.5                            | 14               |
| Nb-TiO <sub>2</sub>                              | 205              | 200         | 50                     | 0.005-3                             | 15               |
| Ta-TiO <sub>2</sub>                              | 210              | 300         | 50                     | 0.005-3                             | 15               |
| S-TiO <sub>2</sub>                               | 186              | 100         | 330                    | 0.01-3                              | 16               |
| N/S-TiO <sub>2</sub>                             | 120.9            | 300         | 1000                   | 0.01-2.5                            | 17               |
| Fe-TiO <sub>2</sub>                              | 164              | 1000        | 1000                   | 0.01-2.5                            | 18               |
| Mo-TiO <sub>2</sub>                              | 108.3            | 50          | 1680                   | 0.01-3                              | 19               |
| Nb-TiO <sub>2</sub>                              | 169              | 100         | 33                     | 0-2.5                               | 20               |
| Sn-TiO <sub>2</sub>                              | 103              | 700         | 5000                   | 0.005-3                             | 21               |
| N/C-TiO <sub>2</sub>                             | 260.4            | 300         | 84                     | 0.01-3                              | 22               |
| TiOF <sub>2</sub> -TiO <sub>2</sub>              | 151.7            | 2000        | 500                    | 0.01-3                              | 23               |
| Ti <sub>3</sub> C <sub>2</sub> -TiO <sub>2</sub> | 153              | 100         | 600                    | 0.01-3                              | 24               |
| C-TiO <sub>2</sub>                               | 125              | 2500        | 1000                   | 0.01-3                              | 25               |
| N/C/TiF <sub>3</sub> -TiO <sub>2</sub>           | 103              | 1000        | 1000                   | 0.01-3                              | 26               |
| CNTs/C-TiO <sub>2</sub>                          | 148              | 100         | 100                    | 0.01-3                              | 27               |
| <b>TiO<sub>2</sub></b>                           | <b>213</b>       | <b>100</b>  | <b>200</b>             | <b>0.01-3</b>                       | <b>This work</b> |
|                                                  | <b>177</b>       | <b>1000</b> | <b>1000</b>            | <b>0.01-3</b>                       |                  |
|                                                  | <b>115</b>       | <b>4000</b> | <b>5000</b>            | <b>0.01-3</b>                       |                  |

## References

1. C. Hou, W. Yang, X. Xie, X. Sun, J. Wang, N. Naik, D. Pan, X. Mai, Z. Guo, F. Dang and W. Du, Agaric-like anodes of porous carbon decorated with MoO<sub>2</sub> nanoparticles for stable ultralong cycling lifespan and high-rate lithium/sodium storage, *J. Colloid Inter. Sci.*, 2021, **596**, 396-407.
2. C. Hou, J. Wang, W. Zhang, J. Li, R. Zhang, J. Zhou, Y. Fan, D. Li, F. Dang, J. Liu, Y. Li, K. Liang and B. Kong, Interfacial Superassembly of Grape-Like MnO–Ni@C Frameworks for Superior Lithium Storage, *ACS Appl. Mater. Interfaces*, 2020, **12**, 13770-13780.
3. W. Li, F. Wang, Y. Liu, J. Wang, J. Yang, L. Zhang, A. A. Elzatahry, D. Al-Dahyan, Y. Xia and D. Zhao, General Strategy to Synthesize Uniform Mesoporous TiO<sub>2</sub>/Graphene/Mesoporous TiO<sub>2</sub> Sandwich-Like Nanosheets for Highly Reversible Lithium Storage, *Nano Lett.*, 2015, **15**, 2186-2193.
4. H. Liu, W. Li, D. Shen, D. Zhao and G. Wang, Graphitic Carbon Conformal Coating of Mesoporous TiO<sub>2</sub> Hollow Spheres for High-Performance Lithium Ion Battery Anodes, *J. Am. Chem. Soc.*, 2015, **137**, 13161-13166.
5. Y. Zhang, N. Zhang, J. Chen, T. Zhang, W. Ge, W. Zhang, G. Xie, L. Zhang and Y. He, Preparation and lithium storage properties of C@TiO<sub>2</sub>/3D carbon hollow sphere skeleton composites, *J. Alloys Compd.*, 2020, **815**, 152511.
6. Y. Cai, H.-E. Wang, X. Zhao, F. Huang, C. Wang, Z. Deng, Y. Li, G. Cao and B.-L. Su, Walnut-like Porous Core/Shell TiO<sub>2</sub> with Hybridized Phases Enabling Fast and Stable Lithium Storage, *ACS Appl. Mater. Interfaces*, 2017, **9**, 10652-10663.
7. D. Zhao, Q. Hao and C. Xu, Nanoporous TiO<sub>2</sub>/Co<sub>3</sub>O<sub>4</sub> Composite as an Anode Material for Lithium-Ion Batteries, *Electrochim. Acta*, 2016, **211**, 83-91.
8. X. Gao, G. Li, Y. Xu, Z. Hong, C. Liang and Z. Lin, TiO<sub>2</sub> Microboxes with Controlled Internal Porosity for High-Performance Lithium Storage, *Angew. Chem, Int. Ed.*, 2015, **54**, 14331-14335.
9. B. Han, S.-J. Kim, B.-M. Hwang, S.-B. Kim and K.-W. Park, Single-crystalline rutile TiO<sub>2</sub> nanowires for improved lithium ion intercalation properties, *J. Power Sources*, 2013, **222**, 225-229.
10. X. Wang, Y. Wang, L. Yang, K. Wang, X. Lou and B. Cai, Template-free synthesis of homogeneous yolk–shell TiO<sub>2</sub> hierarchical microspheres for high performance lithium ion batteries, *J. Power Sources*, 2014, **262**, 72-78.
11. H. Han, T. Song, E.-K. Lee, A. Devadoss, Y. Jeon, J. Ha, Y.-C. Chung, Y.-M. Choi, Y.-G. Jung and U. Paik, Dominant Factors Governing the Rate Capability of a TiO<sub>2</sub> Nanotube Anode for High Power Lithium Ion Batteries, *ACS Nano*, 2012, **6**, 8308-8315.
12. W. Song, H. Zhao, L. Wang, S. Liu and Z. Li, Co-doping Nitrogen/Sulfur through a Solid-State Reaction to Enhance the Electrochemical Performance of Anatase TiO<sub>2</sub> Nanoparticles as a Sodium-Ion Battery Anode, *ChemElectroChem*, 2018, **5**, 316-321.
13. H. He, D. Sun, Q. Zhang, F. Fu, Y. Tang, J. Guo, M. Shao and H. Wang, Iron-Doped Cauliflower-Like Rutile TiO<sub>2</sub> with Superior Sodium Storage Properties, *ACS Appl. Mater. Interfaces*, 2017, **9**, 6093-6103.

14. B. Wang, F. Zhao, G. Du, S. Porter, Y. Liu, P. Zhang, Z. Cheng, H. K. Liu and Z. Huang, Boron-Doped Anatase TiO<sub>2</sub> as a High-Performance Anode Material for Sodium-Ion Batteries, *ACS Appl. Mater. Interfaces*, 2016, **8**, 16009-16015.
15. H. Usui, Y. Domi, K. Takama, Y. Tanaka and H. Sakaguchi, Tantalum-Doped Titanium Oxide with Rutile Structure as a Novel Anode Material for Sodium-Ion Battery, *ACS Appl. Energy Mater.*, 2019, **2**, 3056-3060.
16. W. Zhang, N. Luo, S. Huang, N.-L. Wu and M. Wei, Sulfur-Doped Anatase TiO<sub>2</sub> as an Anode for High-Performance Sodium-Ion Batteries, *ACS Appl. Energy Mater.*, 2019, **2**, 3791-3797.
17. F. Li, W. Liu, Y. Lai, F. Qin, L. Zou, K. Zhang and J. Li, Nitrogen and sulfur co-doped hollow carbon nanofibers decorated with sulfur doped anatase TiO<sub>2</sub> with superior sodium and lithium storage properties, *J. Alloys Compd.*, 2017, **695**, 1743-1752.
18. Y. Lai, W. Liu, J. Li, K. Zhang, F. Qin, M. Wang and J. Fang, High performance sodium storage of Fe-doped mesoporous anatase TiO<sub>2</sub>/amorphous carbon composite, *J. Alloys Compd.*, 2016, **666**, 254-261.
19. H. Liao, L. Xie, Y. Zhang, X. Qiu, S. Li, Z. Huang, H. Hou and X. Ji, Mo-doped Gray Anatase TiO<sub>2</sub> : Lattice Expansion for Enhanced Sodium Storage, *Electrochim. Acta*, 2016, **219**, 227-234.
20. F. Zhao, B. Wang, Y. Tang, H. Ge, Z. Huang and H. K. Liu, Niobium doped anatase TiO<sub>2</sub> as an effective anode material for sodium-ion batteries, *J. Mater. Chem. A*, 2015, **3**, 22969-22974.
21. D. Yan, C. Yu, Y. Bai, W. Zhang, T. Chen, B. Hu, Z. Sun and L. Pan, Sn-doped TiO<sub>2</sub> nanotubes as superior anode materials for sodium ion batteries, *Chem Commun (Camb)*, 2015, **51**, 8261-8264.
22. B. Liu, J. Wang, J. Li, K. Fan, D. Zhao, G. Liu, C. Yang, H. Tong and D. Qian, N-doped carbon coated TiO<sub>2</sub> hollow spheres as ultralong-cycle-life Na-ion battery anodes, *J. Phys. Chem. Solids*, 2019, **134**, 214-224.
23. S. Guan, Q. Fan, Z. Shen, Y. Zhao, Y. Sun and Z. Shi, Heterojunction TiO<sub>2</sub>@TiOF<sub>2</sub> nanosheets as superior anode materials for sodium-ion batteries, *J. Mater. Chem. A*, 2021, **9**, 5720-5729.
24. P. Wang, X. Lu, Y. Boyjoo, X. Wei, Y. Zhang, D. Guo, S. Sun and J. Liu, Pillar-free TiO<sub>2</sub>/Ti<sub>3</sub>C<sub>2</sub> composite with expanded interlayer spacing for high-capacity sodium ion batteries, *J. Power Sources*, 2020, **451**, 227756.
25. Y. Wang, N. Li, C. Hou, B. He, J. Li, F. Dang, J. Wang and Y. Fan, Nanowires embedded porous TiO<sub>2</sub>@C nanocomposite anodes for enhanced stable lithium and sodium ion battery performance, *Ceram. Int.*, 2020, **46**, 9119-9128.
26. H. Xu, W. Wang, G. Yu, L. Qin, Y. Jiang, L. Ren and J. Chen, Nitrogen-Doped Carbon-Coated TiO<sub>2</sub>/TiF<sub>3</sub> Heterostructure Nanoboxes with Enhanced Lithium and Sodium Storage Performance, *ACS Appl. Energy Mater.*, 2020, **3**, 4738-4745.
27. J. Chen, E. Wang, J. Mu, B. Ai, T. Zhang, W. Ge and L. Zhang, CNTs-C@TiO<sub>2</sub> composites with 3D networks as anode material for lithium/sodium ion batteries, *J. Mater. Sci.*, 2019, **54**, 592-604.
